# Supplementary material for: Synthesis, crystal structures and properties of three metal–organic supramolecular architectures based on mixed organic ligands
Source: Royal Society of Chemistry journal article supplement (doi:10.1039/b805379k), 2008-01-01

## **Supporting Information**

# **Synthesis, Crystal Structures and Properties of Three Metal-Organic Supramolecular Architectures Based on Mixed Organic Ligands**

Wentao Ai, Haiyan He, Longjie Liu, Qianjin Liu, Xiaoli Lv, Jing Li, and Daofeng  
Sun\*

*Key Lab for Colloid and Interface Chemistry of Education Ministry, Department of  
Chemistry, Shandong University, Jinan 250100 (P. R. China)*

dfsun@sdu.edu.cn

\*To whom correspondence should be addressed

**General Information.** Commercially available reagents were used as received without further purification. Elemental analyses (C,H,N) were obtained on a Perkin-Elmer 240 elemental analyzer. Thermal gravimetric analysis (TGA) was performed under N<sub>2</sub> on a Perkin Elmer TGA 7 instrument.

**Figure S1.** TGA of 1.

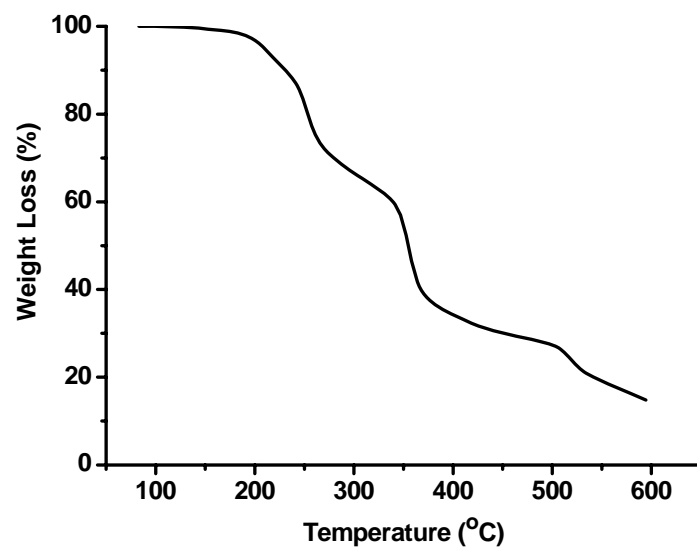

**Figure S2.** TGA of 2.

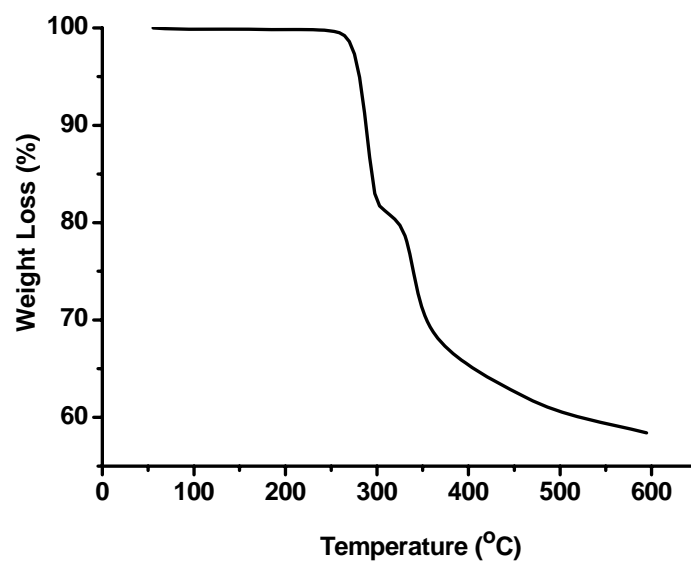

**Figure S3.** TGA of 3.

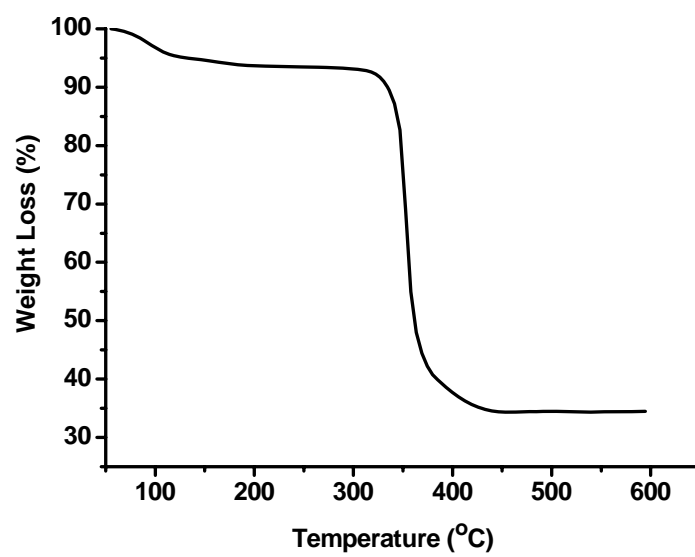

Supplement: b805379k.pdf [file b805379k.pdf]
